# Supplementary material
Source: PubMed Central journal article supplement (PMC4997864)
Supplement: AAC.00658-16_zac009165464st1.pdf [file AAC.00658-16_zac009165464st1.pdf]

1 **Supplemental Tables.**

2 **Table S1.** Comparison of regression modeling for outcomes at 30 days after diagnosis of  
 3 *Staphylococcus aureus* bacteremia, stratified by methicillin resistance, comparing those  
 4 participants with MIC < 2 mcg/mL versus MIC = 2 mcg/mL.

| Model                                                                                                                                                                                                                                                                                                                                                                                                                                                                            | Methicillin-resistant <i>Staphylococcus aureus</i> (N=188) |         | Methicillin-susceptible <i>Staphylococcus aureus</i> (N=228) |         |
|----------------------------------------------------------------------------------------------------------------------------------------------------------------------------------------------------------------------------------------------------------------------------------------------------------------------------------------------------------------------------------------------------------------------------------------------------------------------------------|------------------------------------------------------------|---------|--------------------------------------------------------------|---------|
|                                                                                                                                                                                                                                                                                                                                                                                                                                                                                  | Hazard Ratio (HR) (95% Confidence Interval)                | P-value | Hazard Ratio (HR) (95% Confidence Interval)                  | P-value |
| <b>Mortality, all-cause</b>                                                                                                                                                                                                                                                                                                                                                                                                                                                      |                                                            |         |                                                              |         |
|                                                                                                                                                                                                                                                                                                                                                                                                                                                                                  | (N=17)                                                     |         | (N=27)                                                       |         |
| Cox regression, unadjusted                                                                                                                                                                                                                                                                                                                                                                                                                                                       | HR 0.69 (0.20, 2.39)                                       | 0.55    | HR 1.78 (0.75, 4.21)                                         | 0.19    |
| Cox regression, adjusted                                                                                                                                                                                                                                                                                                                                                                                                                                                         | *HR 0.71 (0.20, 2.62)                                      | 0.61    | ***HR 1.16 (0.48, 2.81)                                      | 0.75    |
| Cox regression with propensity score and covariate adjustment                                                                                                                                                                                                                                                                                                                                                                                                                    | **HR 0.58 (0.16, 2.11)                                     | 0.41    | **HR 1.14 (0.45, 2.88)                                       | 0.78    |
| <p>*adjustment covariates included: age, race, gender, hospital onset, Charlson comorbidity index, vancomycin use, advanced beta-lactam use (ceftaroline, cefepime or carbapenem class), immunosuppressive medication</p> <p>**adjustment covariates included: propensity score, advanced beta-lactam use (ceftaroline, cefepime or carbapenem class)</p> <p>***adjustment covariates included: age, race, gender, hospital onset, Charlson comorbidity index, cefazolin use</p> |                                                            |         |                                                              |         |
| <b>Readmission, all-cause</b>                                                                                                                                                                                                                                                                                                                                                                                                                                                    |                                                            |         |                                                              |         |
|                                                                                                                                                                                                                                                                                                                                                                                                                                                                                  | (N=19)                                                     |         | (N=28)                                                       |         |
| Cox regression, unadjusted                                                                                                                                                                                                                                                                                                                                                                                                                                                       | HR 1.16 (0.42, 3.22)                                       | 0.78    | HR 0.80 (0.28, 2.32)                                         | 0.69    |
| Cox regression, adjusted                                                                                                                                                                                                                                                                                                                                                                                                                                                         | *HR 1.68 (0.56, 5.09)                                      | 0.36    | +HR 0.77 (0.26, 2.24)                                        | 0.63    |

|                                                                                                                                                                                                                                                                                                                                                                                                              |                        |      |                         |      |
|--------------------------------------------------------------------------------------------------------------------------------------------------------------------------------------------------------------------------------------------------------------------------------------------------------------------------------------------------------------------------------------------------------------|------------------------|------|-------------------------|------|
| Cox regression with propensity score and covariate adjustment                                                                                                                                                                                                                                                                                                                                                | **HR 1.36 (0.46, 4.02) | 0.58 | ***HR 0.79 (0.27, 2.30) | 0.66 |
| <p>*adjustment covariates included: age, race, gender, hospital onset, Charlson comorbidity index, immunosuppressive medication, vancomycin use</p> <p>**adjustment covariates included: propensity score, immunosuppressive medication</p> <p>***adjustment covariates included: propensity score</p> <p>+adjustment covariates included: age, race, gender, hospital onset, Charlson comorbidity index</p> |                        |      |                         |      |
| <b>Recurrence of bacteremia</b>                                                                                                                                                                                                                                                                                                                                                                              |                        |      |                         |      |
|                                                                                                                                                                                                                                                                                                                                                                                                              | (N=0)                  |      | (N=1)                   |      |
| Cox regression, unadjusted                                                                                                                                                                                                                                                                                                                                                                                   | HR - (-, -)            | -    | HR - (-, -)             | -    |
| Cox regression, adjusted                                                                                                                                                                                                                                                                                                                                                                                     | HR - (-, -)            | -    | HR - (-, -)             | -    |
| Cox regression with propensity score and covariate adjustment                                                                                                                                                                                                                                                                                                                                                | HR - (-, -)            | -    | HR - (-, -)             | -    |
| Too few outcome events for regression estimation.                                                                                                                                                                                                                                                                                                                                                            |                        |      |                         |      |
| <b>Composite</b>                                                                                                                                                                                                                                                                                                                                                                                             |                        |      |                         |      |
|                                                                                                                                                                                                                                                                                                                                                                                                              | (N=36)                 |      | (N=55)                  |      |
| Cox regression, unadjusted                                                                                                                                                                                                                                                                                                                                                                                   | HR 0.90 (0.41, 1.97)   | 0.79 | HR 1.28 (0.66, 2.47)    | 0.47 |
| Cox regression, adjusted                                                                                                                                                                                                                                                                                                                                                                                     | *HR 0.93 (0.41, 2.12)  | 0.86 | +HR 1.13 (0.58, 2.23)   | 0.72 |
| Cox regression with propensity score and covariate adjustment                                                                                                                                                                                                                                                                                                                                                | **HR 0.94 (0.41, 2.15) | 0.88 | ***HR 1.22 (0.62, 2.40) | 0.56 |
| <p>*adjustment covariates included: age, race, gender, hospital onset, Charlson comorbidity index, immunosuppressive medication</p> <p>**adjustment covariates included: propensity score, recent longterm care facility stay</p>                                                                                                                                                                            |                        |      |                         |      |

\*\*\*adjustment covariates included: propensity score, advanced beta-lactam use (ceftazoline, cefepime or carbapenem class)

†adjustment covariates included: age, race, gender, hospital onset, Charlson comorbidity index, recent longterm care facility stay

- 1
- 2
- 3
- 4
- 5
- 6
- 7
- 8
- 9
- 10
- 11
- 12
- 13
- 14
- 15
- 16
- 17
- 18
- 19
- 20

- 1 **Table S2.** Comparison of regression modeling for outcomes at 90 days after diagnosis of
- 2 *Staphylococcus aureus* bacteremia, stratified by methicillin resistance, comparing those
- 3 participants with MIC < 2 mcg/mL versus MIC = 2 mcg/mL.

| Model                                                                                                                                                                                                                                                                                                                                                                                                                                                                                                                                                                                                                                                                                                                                                                                                                           | Methicillin-resistant <i>Staphylococcus aureus</i> (N=188) |         | Methicillin-susceptible <i>Staphylococcus aureus</i> (N=230) |         |
|---------------------------------------------------------------------------------------------------------------------------------------------------------------------------------------------------------------------------------------------------------------------------------------------------------------------------------------------------------------------------------------------------------------------------------------------------------------------------------------------------------------------------------------------------------------------------------------------------------------------------------------------------------------------------------------------------------------------------------------------------------------------------------------------------------------------------------|------------------------------------------------------------|---------|--------------------------------------------------------------|---------|
|                                                                                                                                                                                                                                                                                                                                                                                                                                                                                                                                                                                                                                                                                                                                                                                                                                 | Hazard Ratio (HR) (95% Confidence Interval)                | P-value | Hazard Ratio (HR) (95% Confidence Interval)                  | P-value |
| <b>Mortality, all-cause</b>                                                                                                                                                                                                                                                                                                                                                                                                                                                                                                                                                                                                                                                                                                                                                                                                     |                                                            |         |                                                              |         |
|                                                                                                                                                                                                                                                                                                                                                                                                                                                                                                                                                                                                                                                                                                                                                                                                                                 | (N=28)                                                     |         | (N=35)                                                       |         |
| Cox regression, unadjusted                                                                                                                                                                                                                                                                                                                                                                                                                                                                                                                                                                                                                                                                                                                                                                                                      | HR 0.69 (0.26, 1.82)                                       | 0.46    | HR 2.06 (0.99, 4.30)                                         | 0.05    |
| Cox regression, adjusted                                                                                                                                                                                                                                                                                                                                                                                                                                                                                                                                                                                                                                                                                                                                                                                                        | *HR 0.47 (0.16, 1.34)                                      | 0.16    | +HR 1.38 (0.64, 3.00)                                        | 0.42    |
| Cox regression with propensity score and covariate adjustment                                                                                                                                                                                                                                                                                                                                                                                                                                                                                                                                                                                                                                                                                                                                                                   | **HR 0.46 (0.16, 1.31)                                     | 0.14    | ***HR 1.56 (0.72, 3.36)                                      | 0.26    |
| <p>*adjustment covariates included: age, race, gender, hospital onset, Charlson comorbidity index, advanced beta-lactam use (ceftaroline, cefepime or carbapenem class), ceftazolin use, immunosuppressive medication, <i>S. aureus</i> infection in the prior 12 months</p> <p>**adjustment covariates included: propensity score, advanced beta-lactam use (ceftaroline, cefepime or carbapenem class), immunosuppressive medication, <i>S. aureus</i> infection in the prior 12 months</p> <p>***adjustment covariates included: propensity score, advanced beta-lactam use (ceftaroline, cefepime or carbapenem class), aminopenicillin use</p> <p>+adjustment covariates included: age, race, gender, hospital onset, Charlson comorbidity index, advanced beta-lactam use (ceftaroline, cefepime or carbapenem class)</p> |                                                            |         |                                                              |         |
| <b>Readmission, all-cause</b>                                                                                                                                                                                                                                                                                                                                                                                                                                                                                                                                                                                                                                                                                                                                                                                                   |                                                            |         |                                                              |         |

|                                                                                                                                                                                                                                                                                                                                                                                                                                                                                                                                                                                                                                                                                                                                                                                                            | (N=57)                 |      | (N=68)                  |      |
|------------------------------------------------------------------------------------------------------------------------------------------------------------------------------------------------------------------------------------------------------------------------------------------------------------------------------------------------------------------------------------------------------------------------------------------------------------------------------------------------------------------------------------------------------------------------------------------------------------------------------------------------------------------------------------------------------------------------------------------------------------------------------------------------------------|------------------------|------|-------------------------|------|
| Cox regression, unadjusted                                                                                                                                                                                                                                                                                                                                                                                                                                                                                                                                                                                                                                                                                                                                                                                 | HR 0.58 (0.29, 1.19)   | 0.14 | HR 0.62 (0.30, 1.29)    | 0.20 |
| Cox regression, adjusted                                                                                                                                                                                                                                                                                                                                                                                                                                                                                                                                                                                                                                                                                                                                                                                   | *HR 0.58 (0.27, 1.23)  | 0.16 | +HR 0.69 (0.33, 1.45)   | 0.33 |
| Cox regression with propensity score and covariate adjustment                                                                                                                                                                                                                                                                                                                                                                                                                                                                                                                                                                                                                                                                                                                                              | **HR 0.56 (0.27, 1.18) | 0.13 | ***HR 0.61 (0.29, 1.28) | 0.66 |
| <p>*adjustment covariates included: age, race, gender, hospital onset, Charlson comorbidity index, hospital length-of-stay prior to onset of bacteremia, treatment with penicillin or oral agents, cefazolin use, vancomycin use, daptomycin use, <i>S. aureus</i> infection in the prior 12 months, recent longterm care facility stay</p> <p>**adjustment covariates included: propensity score, hospital length-of-stay prior to onset of bacteremia, immunosuppressive medication, <i>S. aureus</i> infection in the prior 12 months, treatment with penicillin or oral agents</p> <p>***adjustment covariates included: propensity score</p> <p>+adjustment covariates included: age, race, gender, hospital onset, Charlson comorbidity index, cefazolin use, recent longterm care facility stay</p> |                        |      |                         |      |
| <b>Recurrence of bacteremia</b>                                                                                                                                                                                                                                                                                                                                                                                                                                                                                                                                                                                                                                                                                                                                                                            |                        |      |                         |      |
|                                                                                                                                                                                                                                                                                                                                                                                                                                                                                                                                                                                                                                                                                                                                                                                                            | (N=6)                  |      | (N=4)                   |      |
| Cox regression, unadjusted                                                                                                                                                                                                                                                                                                                                                                                                                                                                                                                                                                                                                                                                                                                                                                                 | HR - (-, -)            | -    | HR - (-, -)             | -    |
| Cox regression, adjusted                                                                                                                                                                                                                                                                                                                                                                                                                                                                                                                                                                                                                                                                                                                                                                                   | HR - (-, -)            | -    | HR - (-, -)             | -    |
| Cox regression with propensity score and covariate adjustment                                                                                                                                                                                                                                                                                                                                                                                                                                                                                                                                                                                                                                                                                                                                              | HR - (-, -)            | -    | HR - (-, -)             | -    |
| Too few outcome events for regression estimation.                                                                                                                                                                                                                                                                                                                                                                                                                                                                                                                                                                                                                                                                                                                                                          |                        |      |                         |      |
| <b>Composite</b>                                                                                                                                                                                                                                                                                                                                                                                                                                                                                                                                                                                                                                                                                                                                                                                           |                        |      |                         |      |
|                                                                                                                                                                                                                                                                                                                                                                                                                                                                                                                                                                                                                                                                                                                                                                                                            | (N=82)                 |      | (N=98)                  |      |
| Cox regression, unadjusted                                                                                                                                                                                                                                                                                                                                                                                                                                                                                                                                                                                                                                                                                                                                                                                 | HR 0.56 (0.31, 1.02)   | 0.06 | HR 1.28 (0.66, 2.47)    | 0.47 |
| Cox regression, adjusted                                                                                                                                                                                                                                                                                                                                                                                                                                                                                                                                                                                                                                                                                                                                                                                   | *HR 0.55 (0.30, 1.01)  | 0.06 | +HR 1.13 (0.58, 2.23)   | 0.72 |

|                                                                                                                                                                                                                                                                                                                                                                                                                                                                                                      |                        |      |                         |      |
|------------------------------------------------------------------------------------------------------------------------------------------------------------------------------------------------------------------------------------------------------------------------------------------------------------------------------------------------------------------------------------------------------------------------------------------------------------------------------------------------------|------------------------|------|-------------------------|------|
| Cox regression with propensity score and covariate adjustment                                                                                                                                                                                                                                                                                                                                                                                                                                        | **HR 0.57 (0.31, 1.05) | 0.07 | ***HR 0.91 (0.53, 1.57) | 0.74 |
| <p>*adjustment covariates included: age, race, gender, hospital onset, Charlson comorbidity index, immunosuppressive medication, vancomycin use</p> <p>**adjustment covariates included: propensity score, immunosuppressive medication, <i>S. aureus</i> infection in the prior 12 months</p> <p>*** adjustment covariates included: propensity score</p> <p>†adjustment covariates included: age, race, gender, hospital onset, Charlson comorbidity index, recent longterm care facility stay</p> |                        |      |                         |      |
